# Supplementary material for: Umbilical cord blood natural killer cells for adoptive immunotherapy: identifying optimal starting material and processing parameters
Source: Frontiers journal article supplement (doi:10.3389/fimmu.2025.1734453), 2026-01-13

Supplementary Figure 1. Flow cytometry gating strategy for flow cytometry-based cytotoxicity assay. The number of live target cells was determined by gating on the CTV+L/D ZombieNIR- population of cells. CD107a expression of NK cells was measured by gating on live, CTV-, CD3-CD56+ cells.

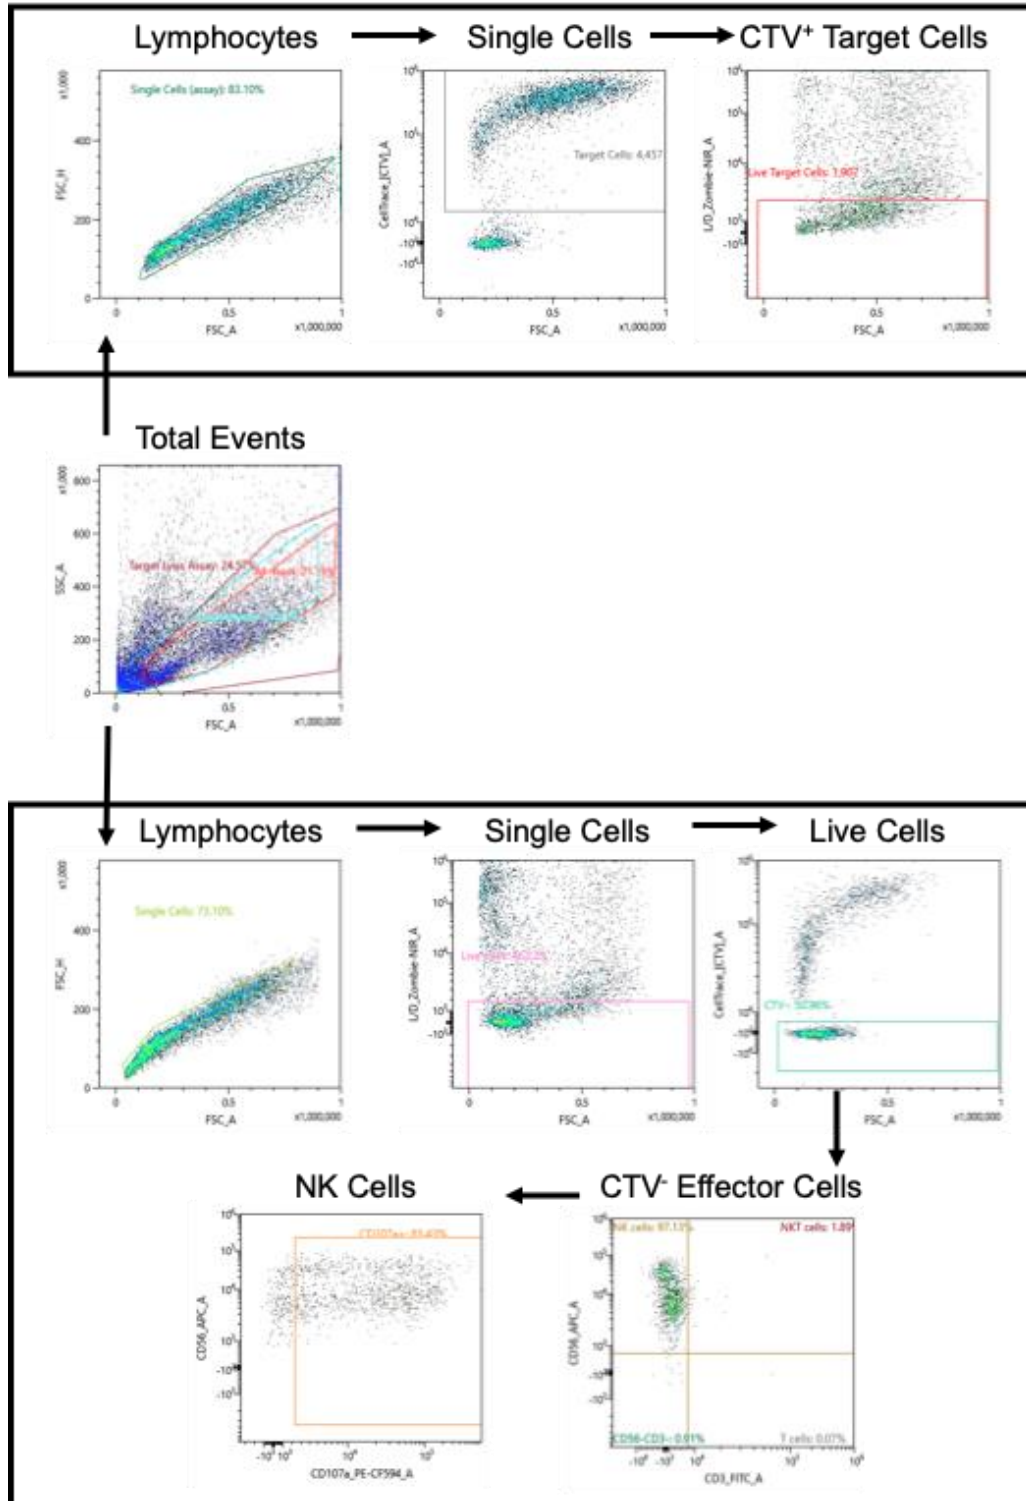

*Supplementary Figure 2. Flow cytometry gating strategy for NK cell phenotyping panels. NK cells were gated on as the CD3-CD56+ cells from the live population of singlet lymphocytes, and expression of activating and inhibitory receptors was calculated as the percentage of CD3-CD56+ cells expressing a given marker.*

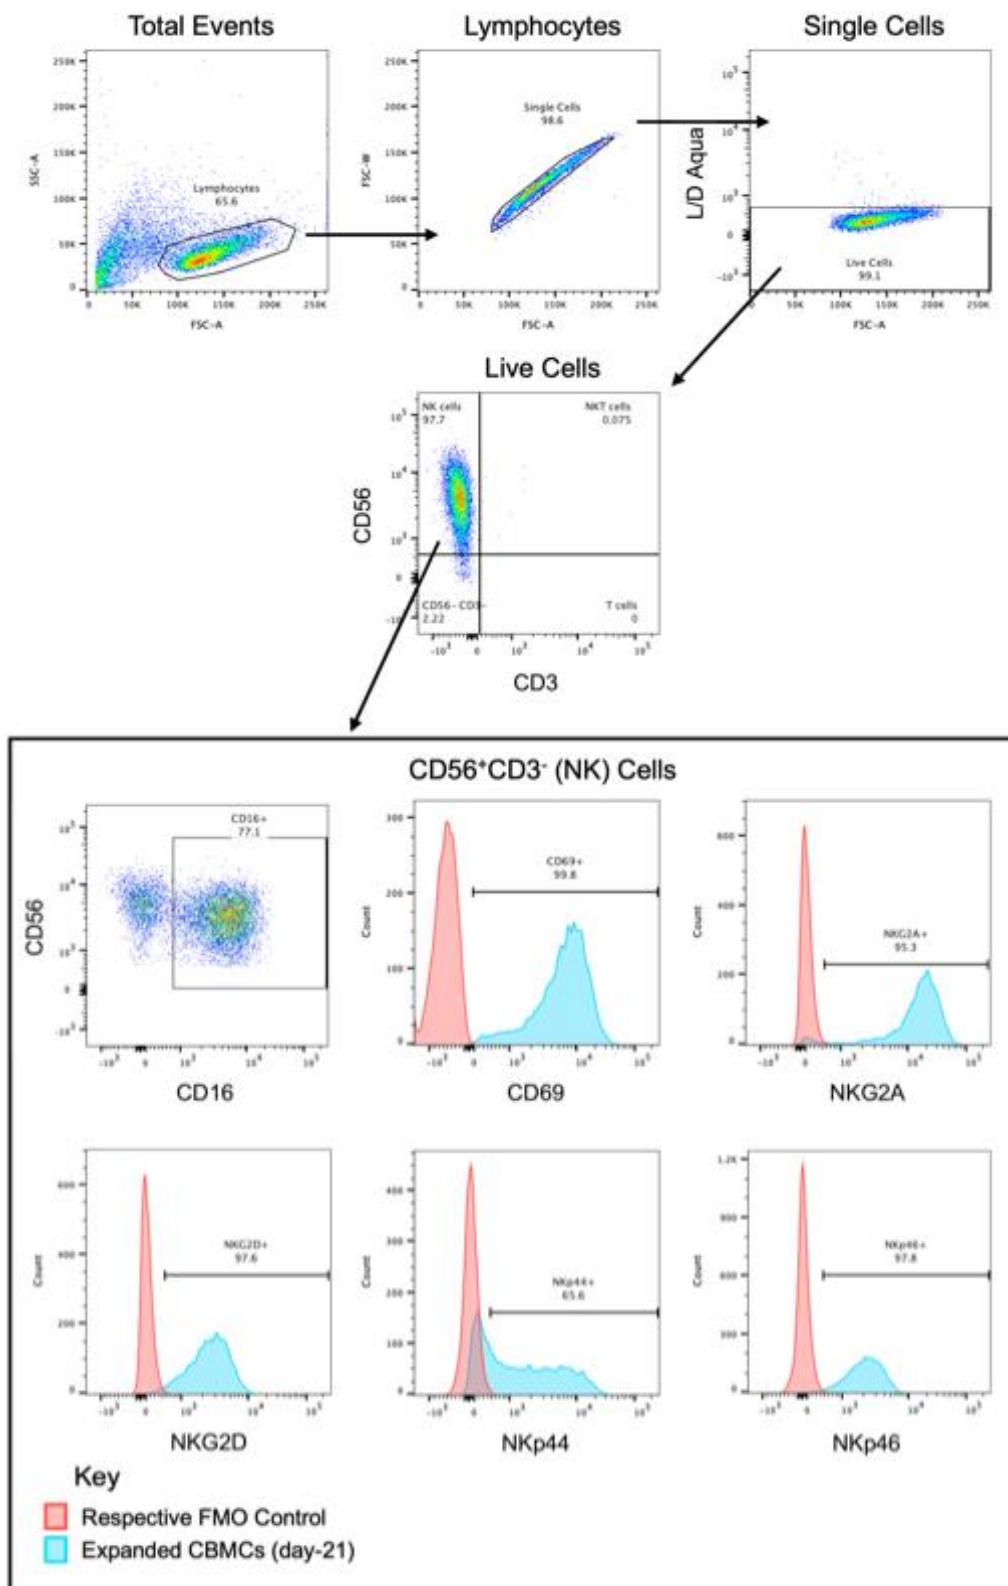

*Supplementary Table 1. Antibody panels used for flow cytometry. Cocktails 1 and 2 were used for phenotypic characterisation of UCB and APB derived NK cells. Cocktail 3 was used for the flow-based cytotoxicity assay, (a) for calculating the percentage of target cell lysis, and (b) for measurement of intracellular IFN- $\gamma$  and TNF- $\alpha$  expression. Cocktail 4 was used to conduct enhanced phenotyping of expanded UCB-derived NK cells post-cryopreservation.*

| Cocktail | Antibody/Stain                             | Cat No.     | Manufacturer |
|----------|--------------------------------------------|-------------|--------------|
| 1        | CD3-FITC                                   | 555339      | BD           |
|          | CD56-APC                                   | 555518      | BD           |
|          | CD16-Alexafluor 700                        | 557920      | BD           |
|          | CD69-PE-CF594                              | 562617      | BD           |
|          | NKG2D-PE                                   | 563688      | BD           |
|          | NKp46-PE-Cy7                               | 562101      | BD           |
|          | LIVE/DEAD Fixable Aqua Dead Cell Stain Kit | L34966      | Invitrogen   |
| 2        | CD3-FITC                                   | 555339      | BD           |
|          | CD56-APC                                   | 555518      | BD           |
|          | NKG2A-PE                                   | 130-113-566 | Miltenyi     |
|          | NKp44-PE-Cy7                               | 325116      | Biolegend    |
|          | LIVE/DEAD Fixable Aqua Dead Cell Stain Kit | L34966      | Invitrogen   |
| 3        | CD3-FITC                                   | 555339      | BD           |
|          | CD56-APC                                   | 555518      | BD           |
|          | CD107a-PE-CF594                            | 562628      | BD           |
|          | Zombie NIR Fixable Viability Kit           | 423106      | Biolegend    |
| 3a       | IFN $\gamma$ -BV421                        | 502532      | Biolegend    |
|          | TNF $\alpha$ -PE                           | 130-120-489 | Miltenyi     |
| 4        | CD3-FITC                                   | 555339      | BD           |
|          | CD56-APC                                   | 555518      | BD           |
|          | CD16-Alexafluor 700                        | 557920      | BD           |
|          | CD69-PE-CF594                              | 562617      | BD           |
|          | NKG2A-PE                                   | 130-113-566 | Miltenyi     |
|          | NKG2D-BV711                                | 563688      | BD           |
|          | NKp44-PE-Cy7                               | 325116      | Biolegend    |
|          | NKp46-BV421                                | 564065      | BD           |
|          | CD2-PE-Cy5                                 | 300210      | Biolegend    |
|          | NKp30-BV605                                | 325234      | Biolegend    |
|          | CD158b/j-APC-Fire750                       | 312618      | Biolegend    |
|          | CD158b2-PerCP-Vio700                       | 130-126-093 | Miltenyi     |
|          | Zombie NIR Fixable Viability Kit           | 423106      | Biolegend    |

*Supplementary Figure 3. Purity and Identity of CD3 depleted CBMCs. Graph showing the percentage of residual CD3+ cells present in the population following isolation (CBMC isolation and CD3 depletion), on the day of thawing and after 7, 14 and 21 days in culture.*

- (A) For cells isolated using magnetic beads and MACS columns (Miltenyi Biotech)
- (B) For cells isolated using FACS (Tyto- Miltenyi Biotech) and
- (C) Phenotypic Identity of cells following CD3 depletion (MACS columns) the mean of CD3<sup>-</sup>CD56<sup>+</sup> cells is 51.7±15.2%)

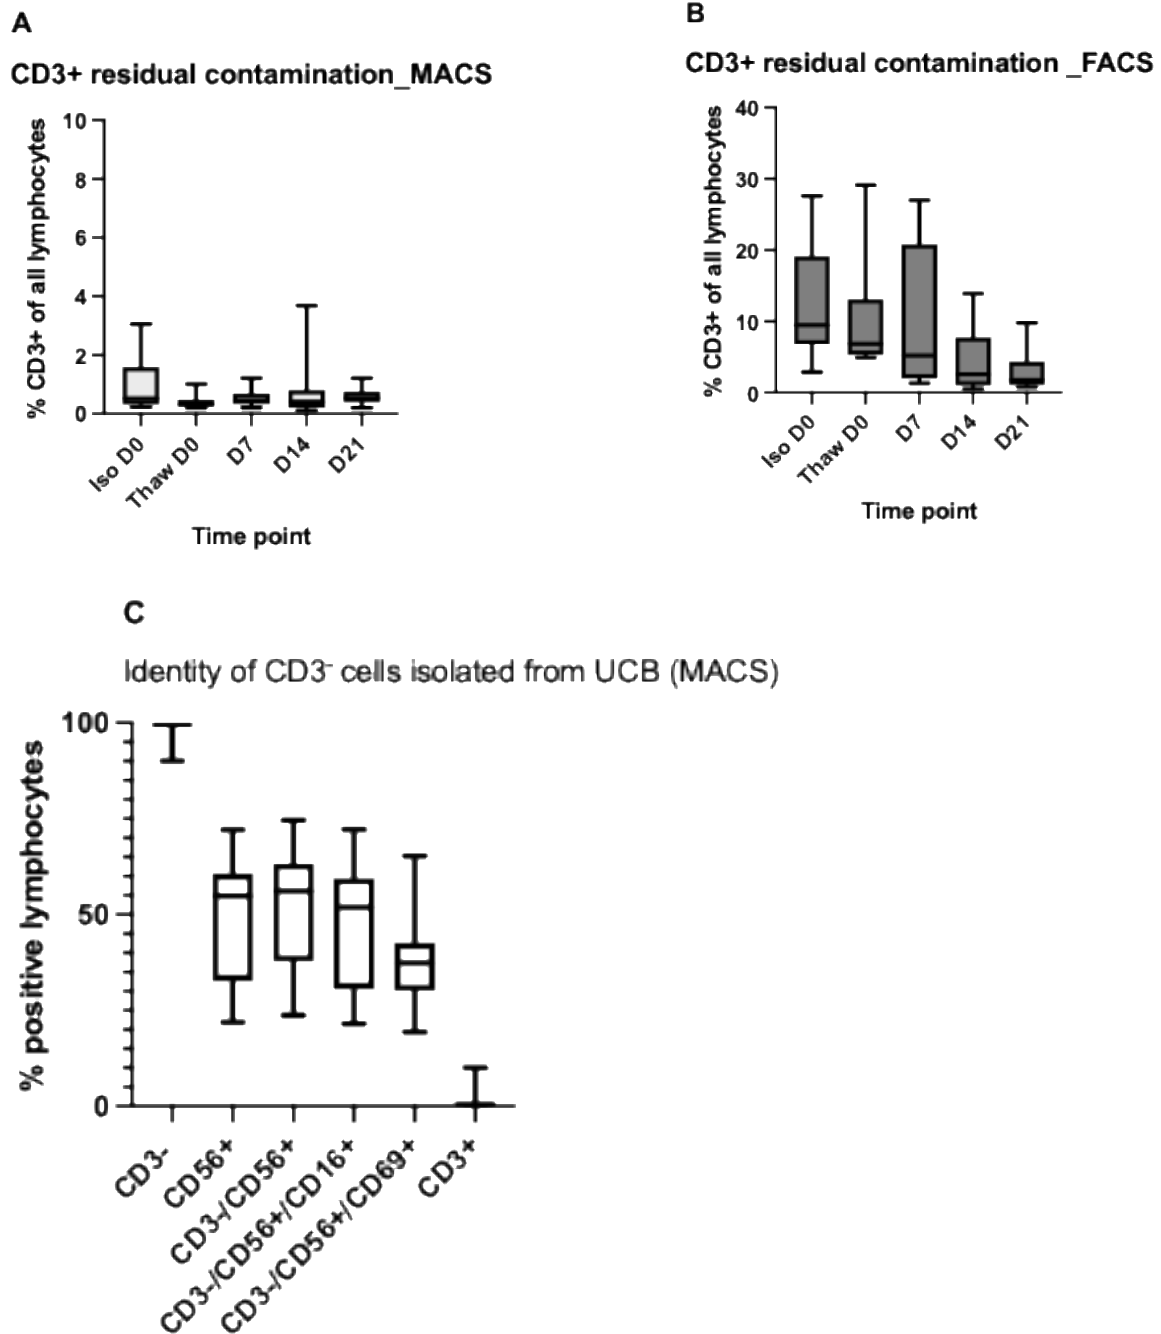

*Supplementary table 2. Mean and standard deviation values used for the correlational matrix.*

|                                               | Cohort               |                |                              |                |
|-----------------------------------------------|----------------------|----------------|------------------------------|----------------|
|                                               | Fresh Starting Cells |                | Cryopreserved Starting Cells |                |
|                                               | Mean                 | Std. Deviation | Mean                         | Std. Deviation |
| D21 Fold Expansion                            | 62.19                | ± 35.37        | 283.8                        | ± 126.5        |
| D21 Cytotoxicity                              | 44.72                | ± 11.53        | 49.04                        | ± 12.11        |
| Gestational Age (d)                           | 278.1                | ± 7.955        | 281.5                        | ± 6.983        |
| Birthweight (g)                               | 3439                 | ± 473.5        | 3737                         | ± 600.5        |
| Maternal Age (y)                              | 32.59                | ± 7.33         | 32.23                        | ± 5.464        |
| No. White Blood Cells (WBC; E+03/uL)          | 9.025                | ± 2.434        | 10.73                        | ± 2.663        |
| No. Red Blood Cells (RBC; E+06/uL)            | 2.95                 | ± 0.4763       | 2.925                        | ± 0.2637       |
| Red Cell Distribution Width (RDW-SD; fL)      | 73.62                | ± 6.812        | 73.37                        | ± 7.542        |
| Platelet Density Width (PDW; fL)              | 10.04                | ± 1.426        | 9.992                        | ± 1.146        |
| Lymphocyte (% of WBC diff)                    | 35.33                | ± 9.434        | 33.79                        | ± 6.484        |
| %Monocyte                                     | 10.6                 | ± 2.383        | 11.73                        | ± 2.705        |
| No. Nucleated Red Blood Cells (NRBC; E+03/uL) | 0.6286               | ± 0.71         | 0.48                         | ± 0.3847       |
| Total Nuclear Count (TNC)                     | 98.02                | ± 36.29        | 116.2                        | ± 29.99        |
| No. Mononuclear Cells excluding NRBCs (E+07)  | 40.65                | ± 14.23        | 49.66                        | ± 11.33        |
| Sample Weight (g)                             | 133.2                | ± 18.86        | 143                          | ± 10.72        |
| Sample Volume (ml)                            | 99.04                | ± 16.52        | 104                          | ± 10.16        |
| Time to Refridgeration (m)                    | 28.34                | ± 15.71        | 31.08                        | ± 8.281        |
| Time to Isolation (h)                         | 43.79                | ± 7.735        | 19.38                        | ± 3.341        |

**Supplementary Figure 4. Correlational matrix heatmaps with full annotation of p values and r values.** (A) Corresponds to figure 3A in the manuscript. (B) Corresponds to figure 5A in the manuscript.

**A**

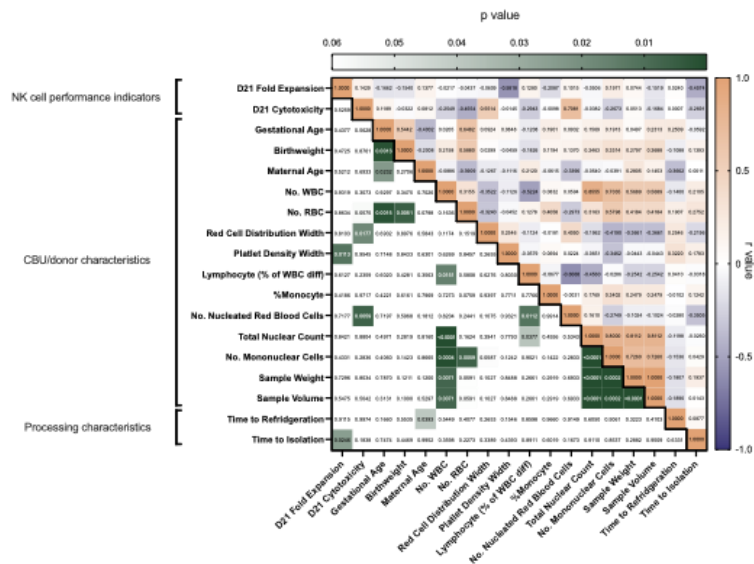

**B**

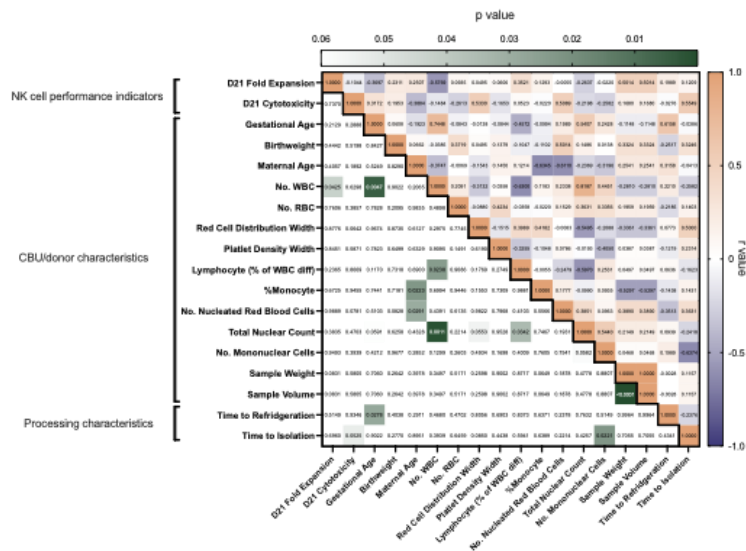

Supplementary Figure 5. The subdivision of the delivery types between the vaginal deliveries (VD) and caesarean sections (CS) in the two UCB sample groups for this study plotted against day 21 NK cell fold expansion.

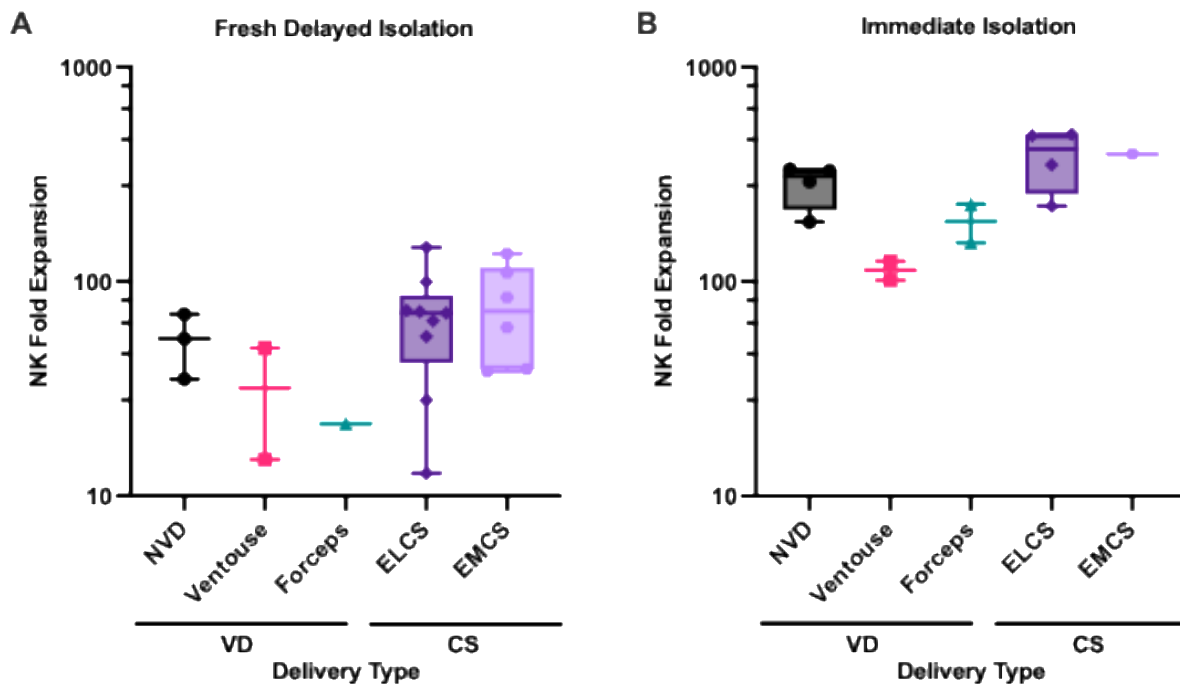

Supplementary Fig 6. Equation used to calculate the approximate predicted yield of NK cells per  $1 \times 10^8$  CBMCs used for  $CD3^-$  CBMC isolation and NK cell expansion in a feeder free system.

Approximate predicted yield was calculated for each CBU that was collected from a CS delivery and processed in the optimal way (NK cells expanded from cryopreserved  $CD3^-$  CBMCs that were isolated immediately;  $n=5$ ). Using the number of live  $CD3^-$  CBMCs recovered post-thaw per  $1 \times 10^8$  CBMCs input into the  $CD3^+$  cell depletion, the initial percentage of NK cells and the NK specific fold expansion. The predicted yield was calculated from expansion data from each CBU then the average was taken ( $1.14 \times 10^9 \pm 3.398 \times 10^8$ ).

$$\text{Predicted Yield} = \frac{\text{initial \%CD56}^+\text{CD3}^- \times \text{no. live cells post thaw}}{100} \times \text{NK cell fold expansion}$$



*Supplementary Fig 7. Flow cytometry plots (forward and side scatter) showing the leukocyte populations on UCB derived cells after (A) initial isolation, (B) following freeze/thaw and after (C) 7 days and (D) 14 days in culture. The differences in the proportions of the leukocyte populations, suggest a preferential loss of monocytes over time which starts after the freeze/thaw cycle, and continues through the culture period (the same cord sample was used for each of the plots)*

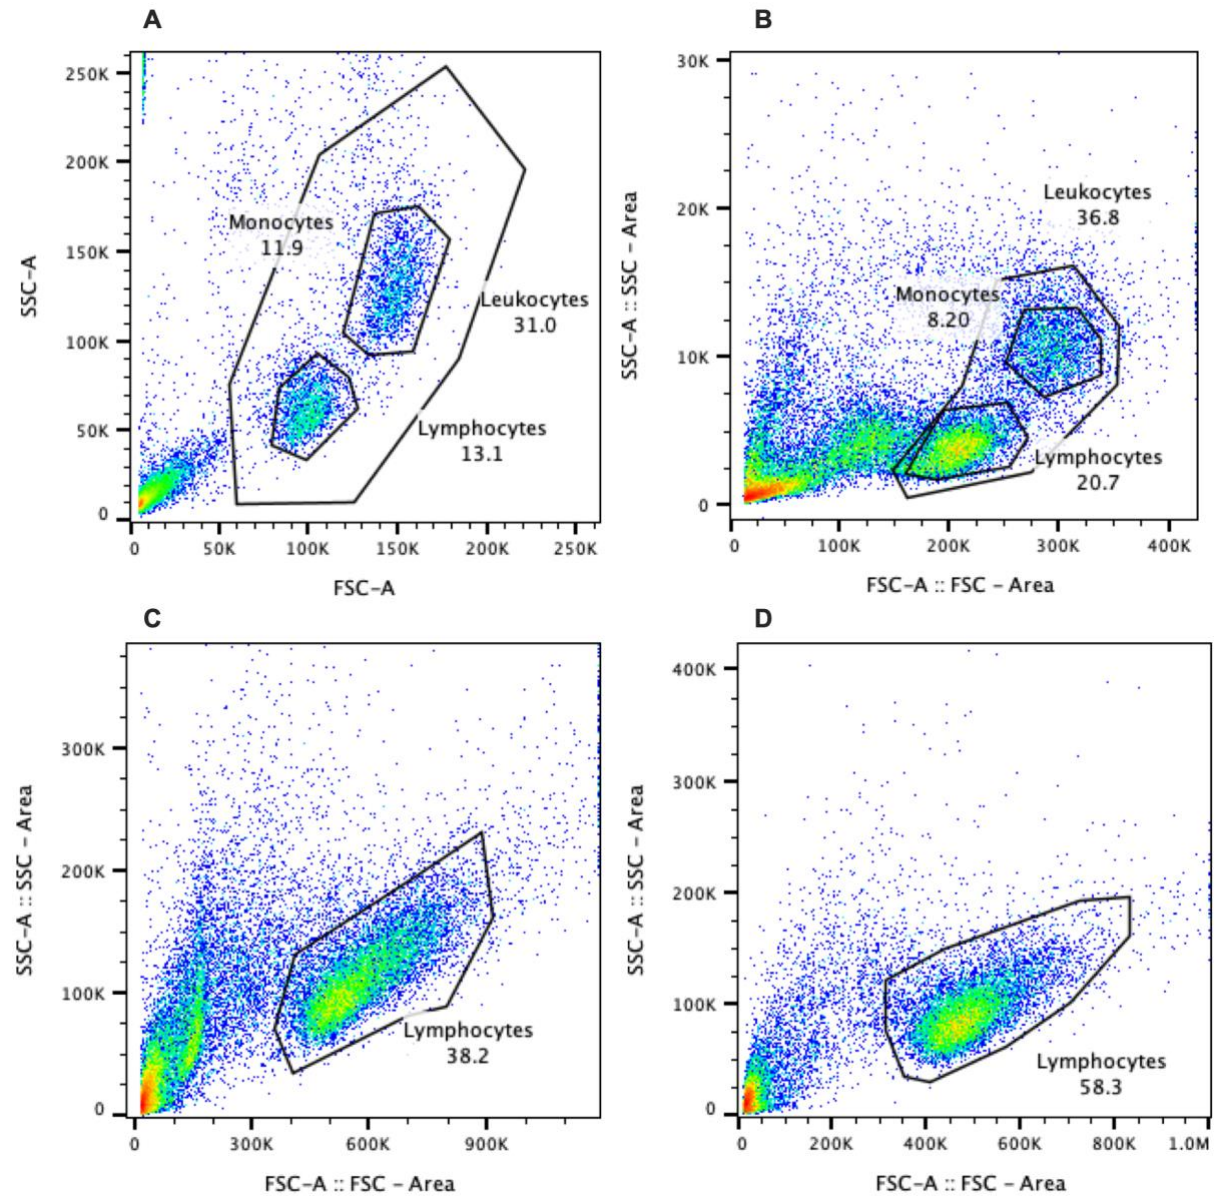

Supplement: Data_Sheet_1.pdf [file Data_Sheet_1.pdf]
